# Supplementary material for: Early-life immunomodulation by carvacrol delivered in ovo in broiler chickens
Source: PubMed Central journal article supplement — Poult Sci. 2024 Sep 5;103(12):104286. doi: 10.1016/j.psj.2024.104286 (PMC11470485; doi:10.1016/j.psj.2024.104286), 2024-09-05

## Confirmation of Publication and Licensing Rights

August 9th, 2024  
Science Suite Inc.

**Subscription:** Institution  
**Agreement number:** SJ275UE5ZW  
**Journal name for publication:** Poultry Science

**Figure name:** Figure 1: Timeline and egg/chicken distribution.

**Effective Date:** August 9th, 2024

To whom this may concern,

This document ("Confirmation") hereby confirms that Science Suite Inc. dba BioRender ("BioRender") has granted the following BioRender user: Mila Meijer ("User") a BioRender Academic License in accordance with BioRender's [Terms of Service](#) and [Academic License Terms](#) ("License Terms") to permit such User to do the following on the condition that all requirements in this Confirmation are met:

- 1) publish their Completed Graphics created in the BioRender Services containing both User Content and BioRender Content (as both are defined in the License Terms) in journal and textbook publications; and
- 2) sublicense such Completed Graphics under "open access" publication sublicensing models such as CC-BY 4.0 and more restrictive models, so long as the conditions set forth herein are fully met.

Requirements of User:

- 1) All Completed Graphics to be published in any journal/textbook must be accompanied by the following citation either as a caption, footnote or reference for each figure that includes a Completed Graphic: "Created with [BioRender.com](#)".
- 2) All terms of the License Terms including all Prohibited Uses are fully complied with. E.g. For Academic License Users, no commercial use beyond publication in a journal is permitted without obtaining or switching to a BioRender Industry Plan.

Open-Access Journal Readers:

Open-Access journal readers ("Reader") who wish to view and/or re-use a particular Completed Graphic in an Open-Access journal subject to CC-BY sublicensing may do so by clicking on the URL link in the applicable citation for the subject Completed Graphic.

- 1) View-Only/Free Plan Use: A Reader who wishes to only view the Completed Graphic may do so in the BioRender Services as either a BioRender Free Plan user or simply as a viewer. By becoming a BioRender Free Plan user, the Reader may view, modify and re-use the Completed Graphic as permitted under BioRender's [Basic License Terms](#) (e.g. personal use only, no publishing or commercial use permitted).
- 2) Re-Use with No Modifications: For any re-use/re-publication of a Completed Graphic with no modification(s) to the Completed Graphic made by the Reader, a Reader may do so so long as the

underlying License Terms which apply to the Completed Graphic are complied with by the Reader (e.g. no commercial use for Academic License).

- 3) **Re-Use with Modifications:** For any re-use/re-publication of a Completed Graphic with a modification(s) made by the Reader, the Reader may do so by becoming a BioRender user themselves under either an Academic or Industry Plan and comply with the applicable License Terms.

For any questions regarding this Confirmation, please email BioRender at [support@biorender.com](mailto:support@biorender.com).

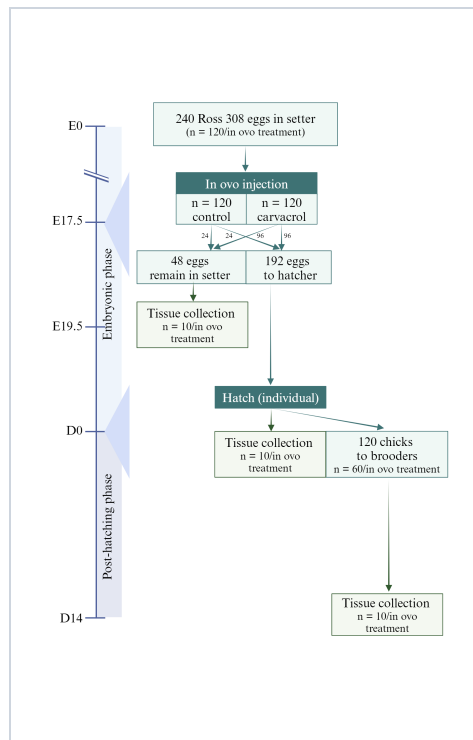

Supplement: mmc1.pdf [file mmc1.pdf]
